# Supplementary material for: Efficacy of a Small-Molecule Inhibitor of KrasG12D in Immunocompetent Models of Pancreatic Cancer
Source: Oxford University Press journal article supplement (doi:10.1158/2159-8290.cd-22-1066), 2022-12-06
Supplement: cd-22-1066_supplementary_table_suppst1.docx [file cd-22-1066_supplementary_table_suppst1.docx]

Supplementary Table

Flow cytometry antibodies

| **Flow**  **Antibody** | **Supplier** | **Clone** | **Dilution** | **Catalog Number** |
| --- | --- | --- | --- | --- |
| CD4 BV650 | Biolegend | RM4-5 | 1:100 | 100546 |
| Ly-6C BV570 | Biolegend | HK1.4 | 1:100 | 128030 |
| CD11b PerCP/Cy5.5 | BD | M1/70 | 1:100 | 550993 |
| CD11c BV605 | Biolegend | N418 | 1:100 | 117334 |
| F4/80 APC/Cy7 | Biolegend | BM8 | 1:100 | 123118 |
| CD45 AF700 | Biolegend | 30-F11 | 1:100 | 103128 |
| Ly-6G V450 | BD | 1A8 | 1:100 | 560603 |
| CD8a PE/Cy7 | Biolegend | 53-6.7 | 1:100 | 100722 |
| CD3e PE/Cy5 | Biolegend | 145-2C11 | 1:100 | 100310 |
| CD103 PE/Dazzle 594 | Biolegend | 2E7 | 1:100 | 121430 |
| CD206 (MMR) PE/Cy7 | Biolegend | C068C2 | 1:100 | 141719 |
| I-A/I-E (MHC II) APC/Cy7 | Biolegend | M5/114.15.2 | 1:100 | 107628 |
| H-2Kb/H-2Db (MHC I)  PerCP/Cy5.5 | Biolegend | 28-8-6 | 1:100 | 114619 |
| CD4 BUV395 | BD | GK1.5 | 1:100 | 563790 |
| CD8a BUV805 | BD | 53.-6.7 | 1:100 | 564920 |
| CD3 BV711 | Biolegend | 17A2 | 1:100 | 100241 |
| Ki-67 PerCP/Cy5.5 | Biolegend | 16A8 | 1:100 | 652424 |
| CD45 APC | Biolegend | 30-F11 | 1:100 | 103112 |
| CD3 FITC | Biolegend | 145-2C11 | 1:100 | 100306 |
| CD4 PE/Cy7 | Biolegend | RM4-5 | 1:100 | 100528 |
| CD8 APC/Cy7 | Biolegend | 53-6.7 | 1:100 | 100714 |
| GZMB PE | Biolegend | QA16A02 | 1:20 | 372208 |
| IFNγ APC | BD | XMG1.2 | 1:100 | 554413 |
| CD3 BUV395 | BD | 17A2 | 1:100 | 740268 |
| CD4 BUV805 | BD | GK1.5 | 1:100 | 612900 |
| CD8 BV785 | Biolegend | 53-6.7 | 1:100 | 100750 |
| TNFa BV421 | Biolegend | MP6-XT22 | 1:50 | 506327 |

Immunostaining and immunoblotting antibodies

| **Antibody** | **Supplier** | **Catalog Number** | **IF dilution** | **WB dilution** |
| --- | --- | --- | --- | --- |
| Endomucin (EMCN) | Santa Cruz | sc-65495 | 1:200 | - |
| Alpha-smooth muscle actin (aSMA) | Sigma-Aldrich | A2547 | 1:1000 | - |
| Cleaved caspase 3 (CC3) | Cell Signaling | 9661 | 1:100 | - |
| Ki-67 | eBioscience | 14-5698-82 | 1:100 | - |
| GFP | Abcam | Ab13970 | 1:200 |  |
| F4/80 | Cell Signaling | 70076 | 1:250 | - |
| CD8 | Cell Signaling | 98941 | 1:400 | - |
| CK19 (TROMA-III) | Iowa Developmental Hybridoma Bank | AB-2133570 | 1:200 |  |
| ERK1/2 | Cell Signaling | 4695 | - | 1:1000 |
| p-ERK1/2 | Cell Signaling | 4370 | 1:100 | 1:1000 |
| AKT | Cell Signaling | 4691 | - | 1:1000 |
| p-AKT | Cell Signaling | 4060 | - | 1:1000 |
| S6 | Cell Signaling | 2217 | - | 1:1000 |
| p-S6 | Cell Signaling | 2211 | 1:100 | 1:1000 |
| a-tubulin | Cell Signaling | 3873 | - | 1:2000 |
